# Supplementary material
Source: Springer Nature journal article supplement (https://www.springermedizin.de/resource/supplementary/12914_2008_70_MOESM2_ESM.pdf/9537448)

**Forest plot of the odds ratios (ORs) and 99% confidence intervals (CIs) of individual countries and pooled data for sex of the respondents**

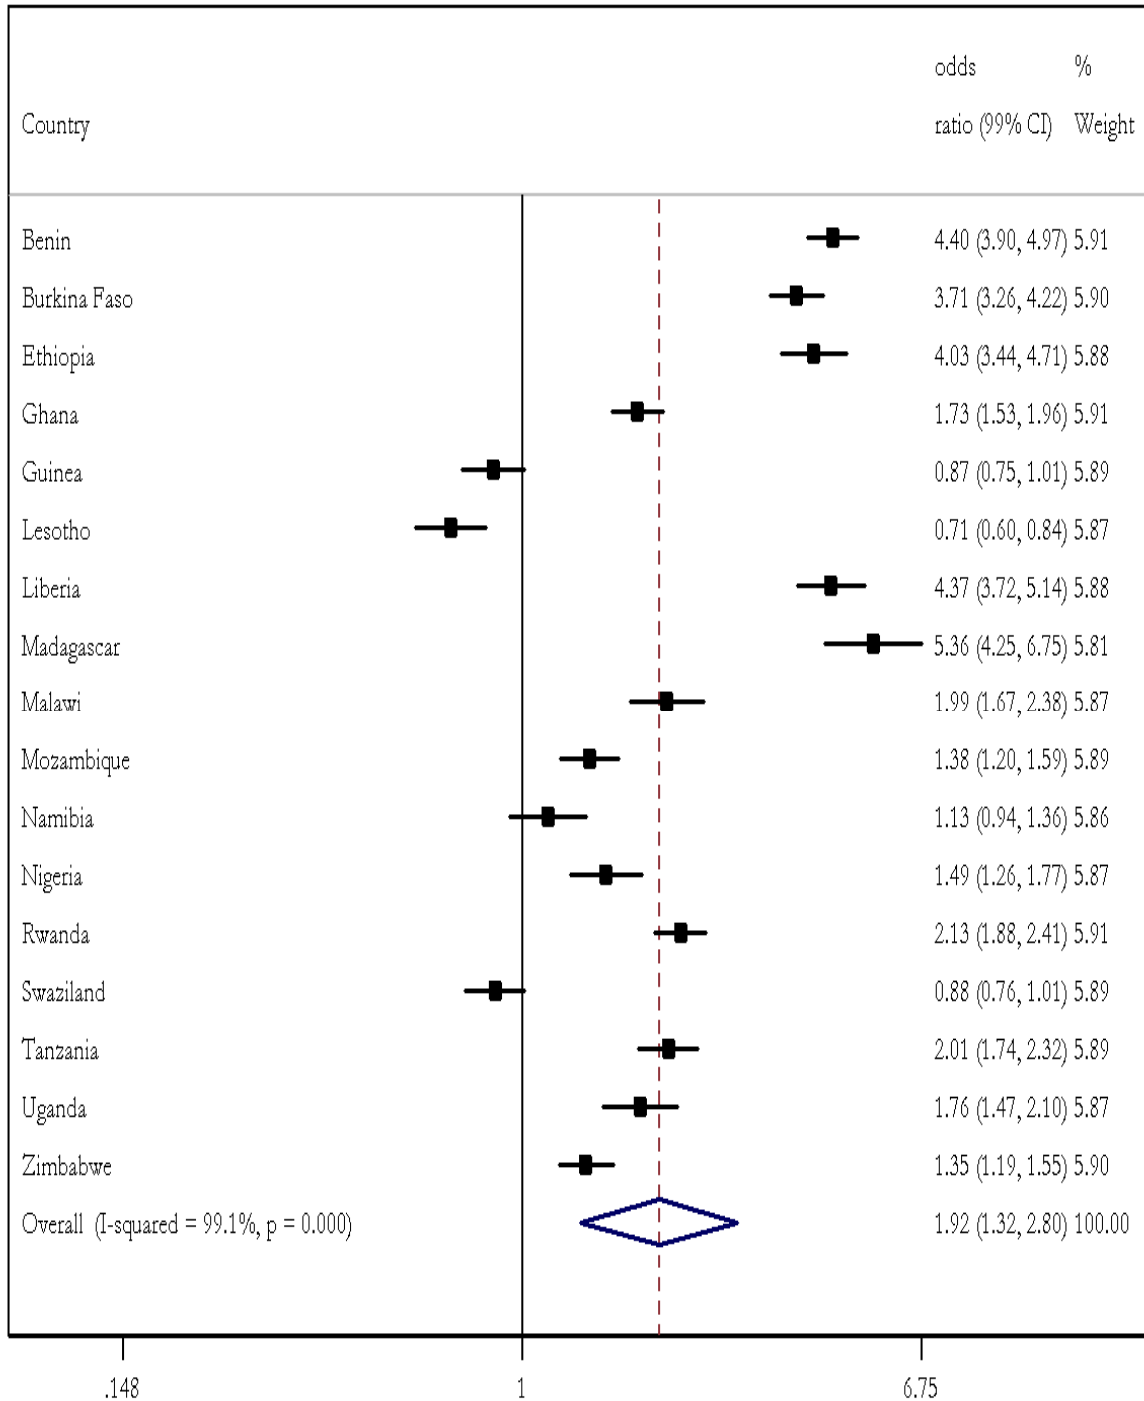

**Forest plot of the odds ratios (ORs) and 99% confidence intervals (CIs) of individual countries and pooled data for Age group (15 – 25 versus 35 or older)**

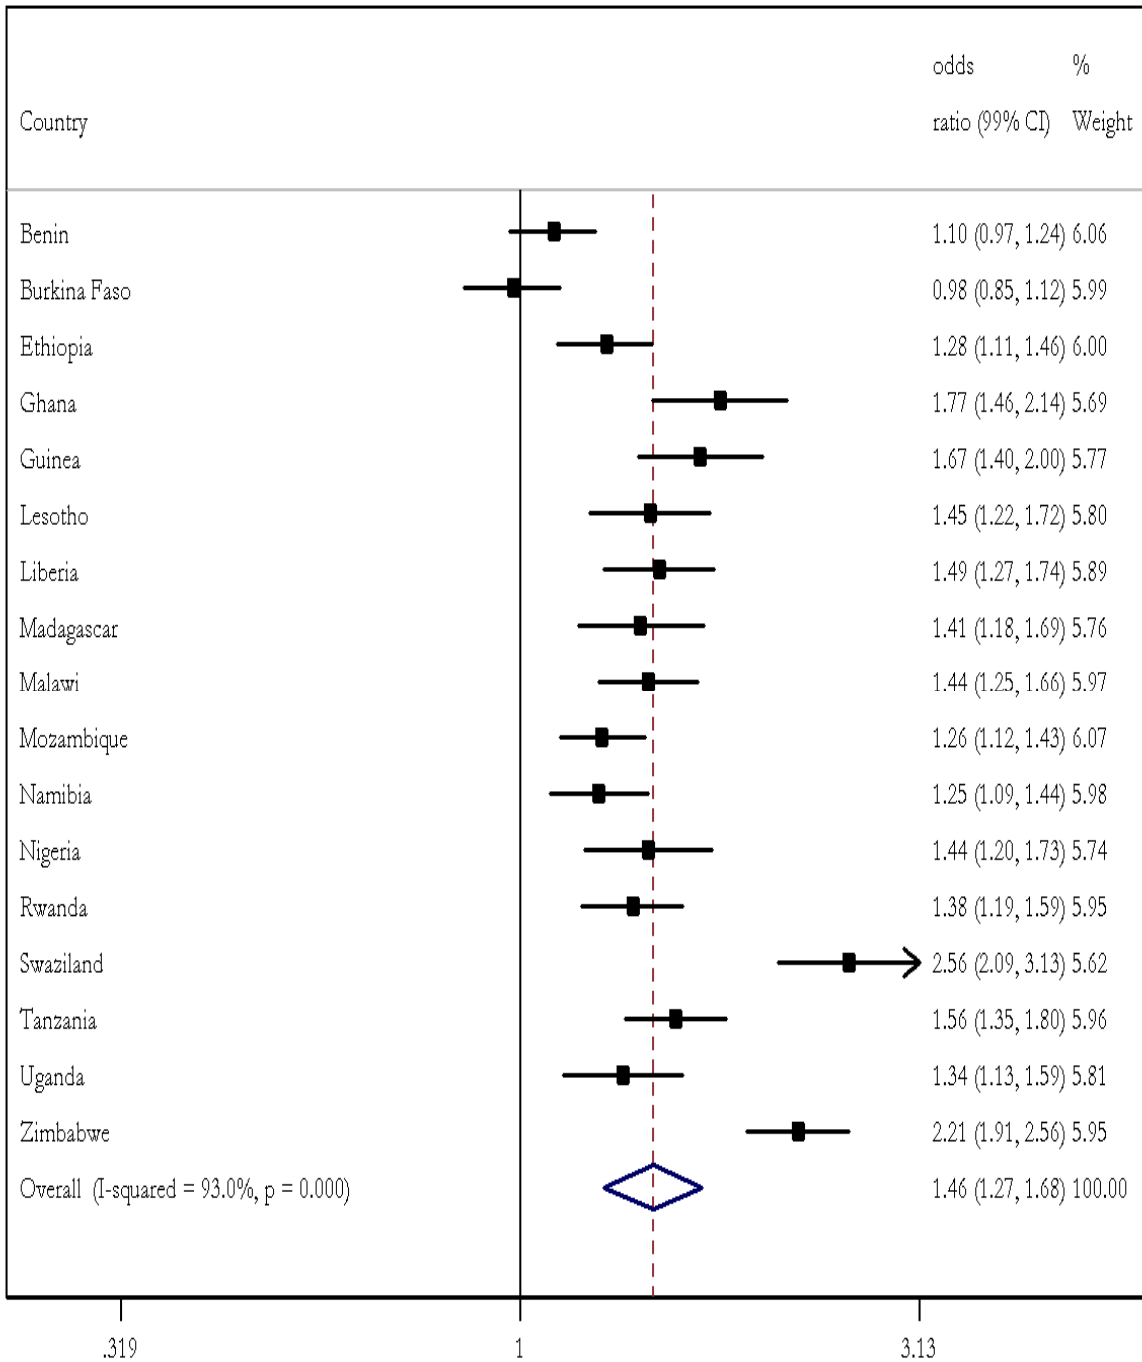

**Forest plot of the odds ratios (ORs) and 99% confidence intervals (CIs) of individual countries and pooled data for Age group (25-34 versus 35 or older)**

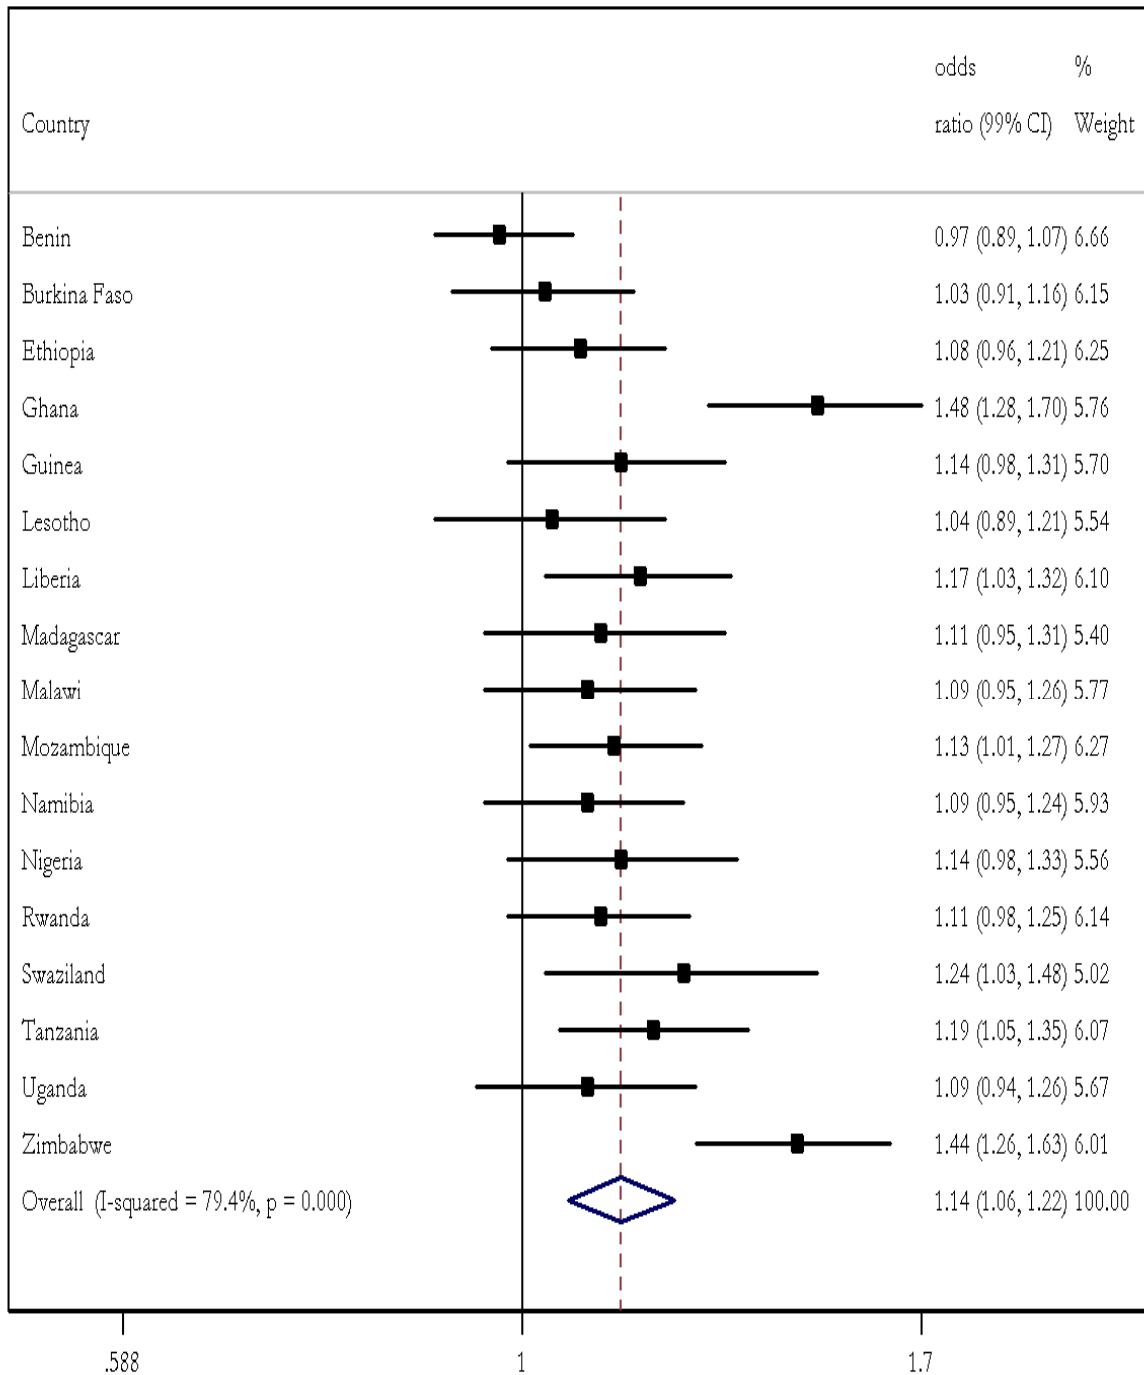

**Forest plot of the odds ratios (ORs) and 99% confidence intervals (CIs) of individual countries and pooled data for education attainment (no education)**

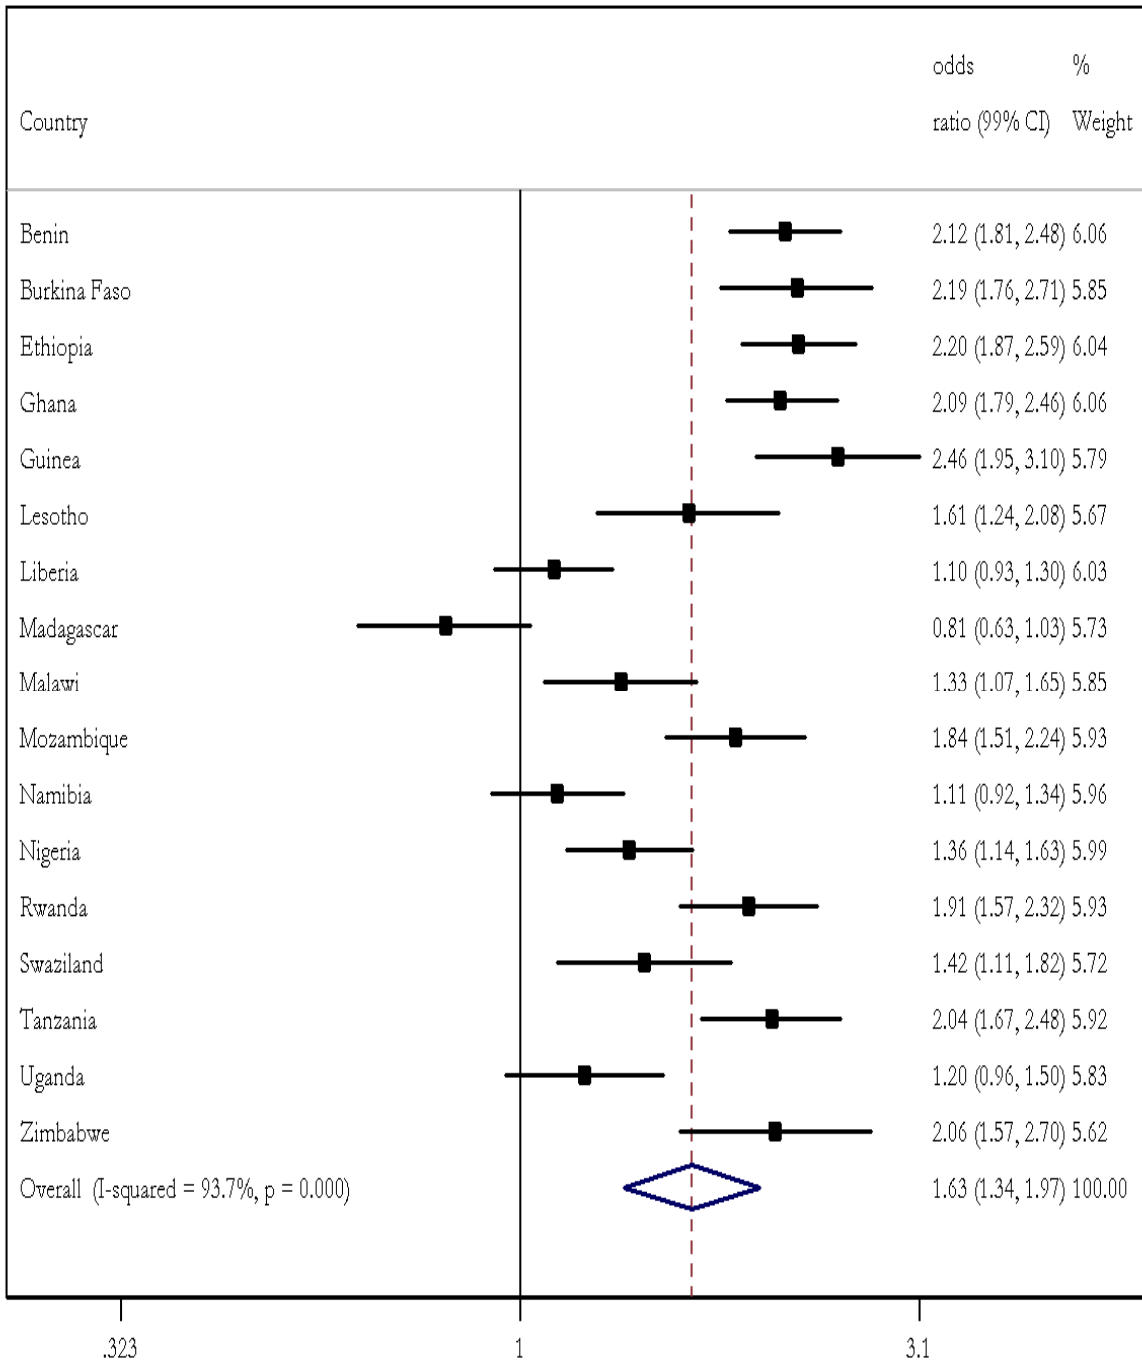

**Forest plot of the odds ratios (ORs) and 99% confidence intervals (CIs) of individual countries and pooled data for education attainment (Primary)**

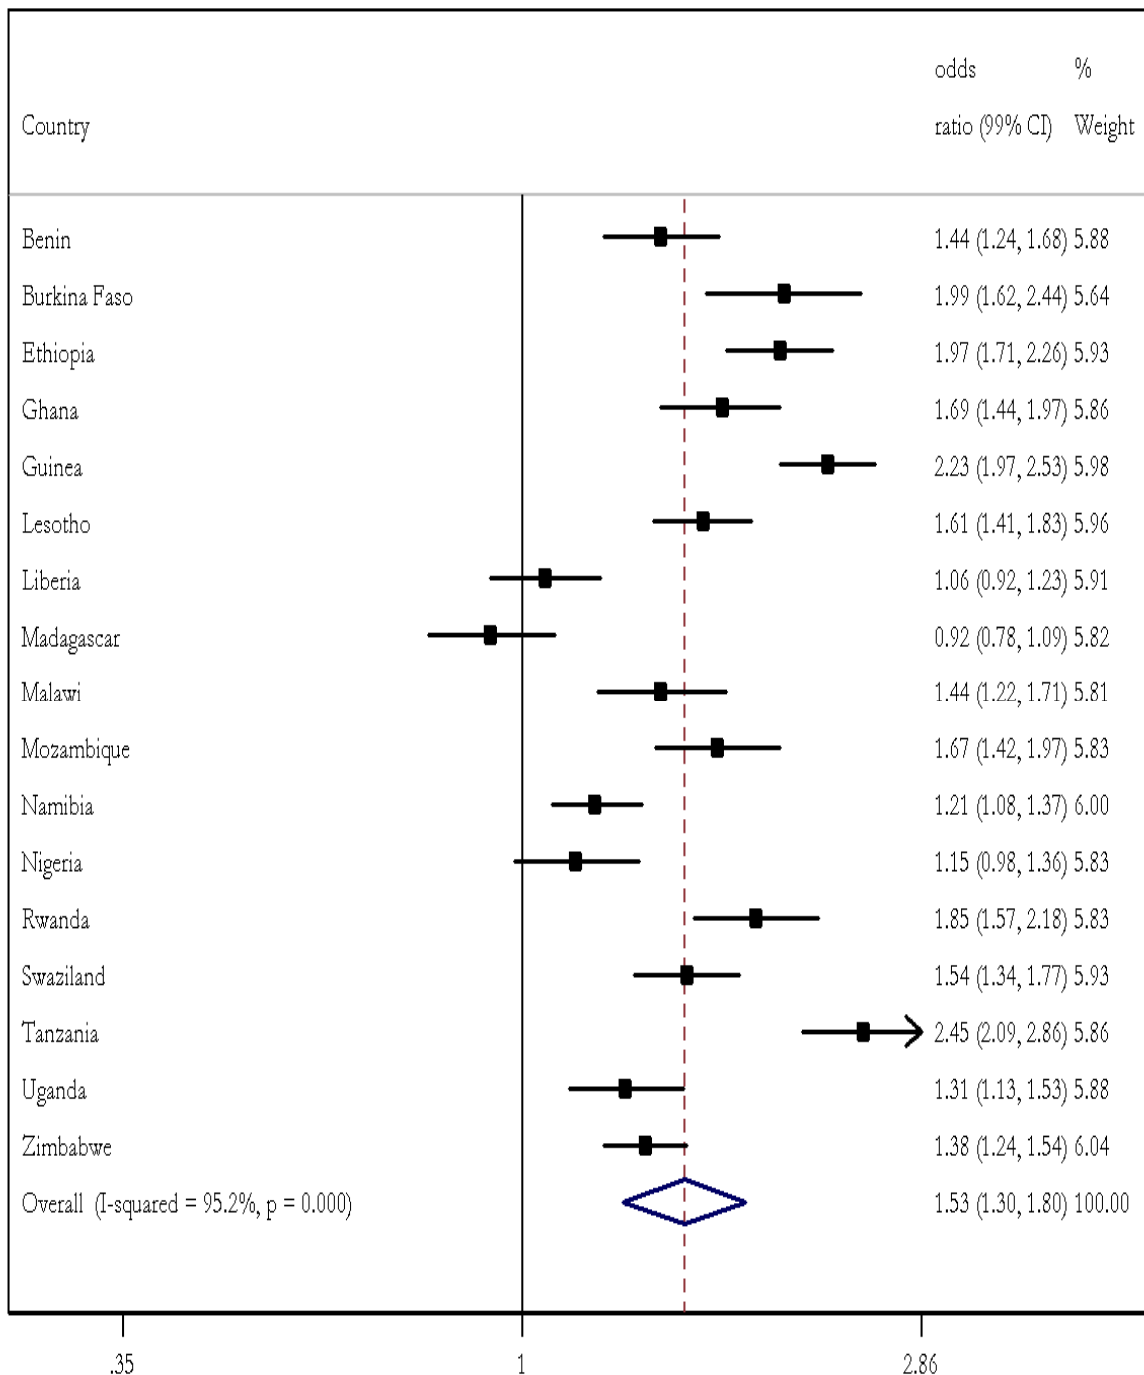

**Forest plot of the odds ratios (ORs) and 99% confidence intervals (CIs) of individual countries and pooled data for occupation status**

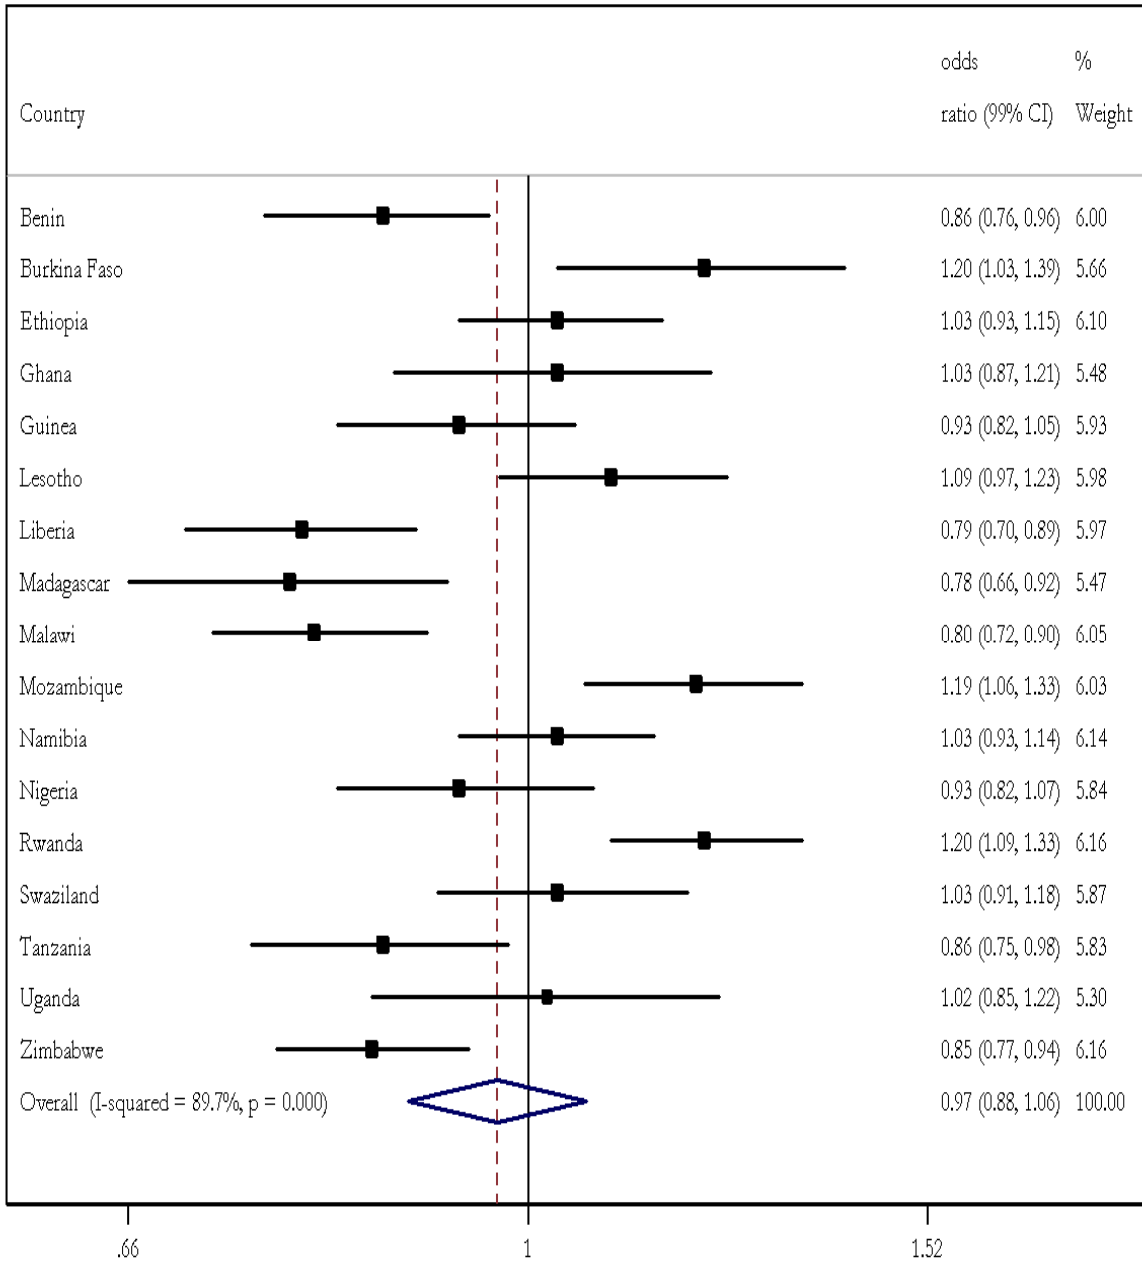

**Forest plot of the odds ratios (ORs) and 99% confidence intervals (CIs) of individual countries and pooled data for currently married**

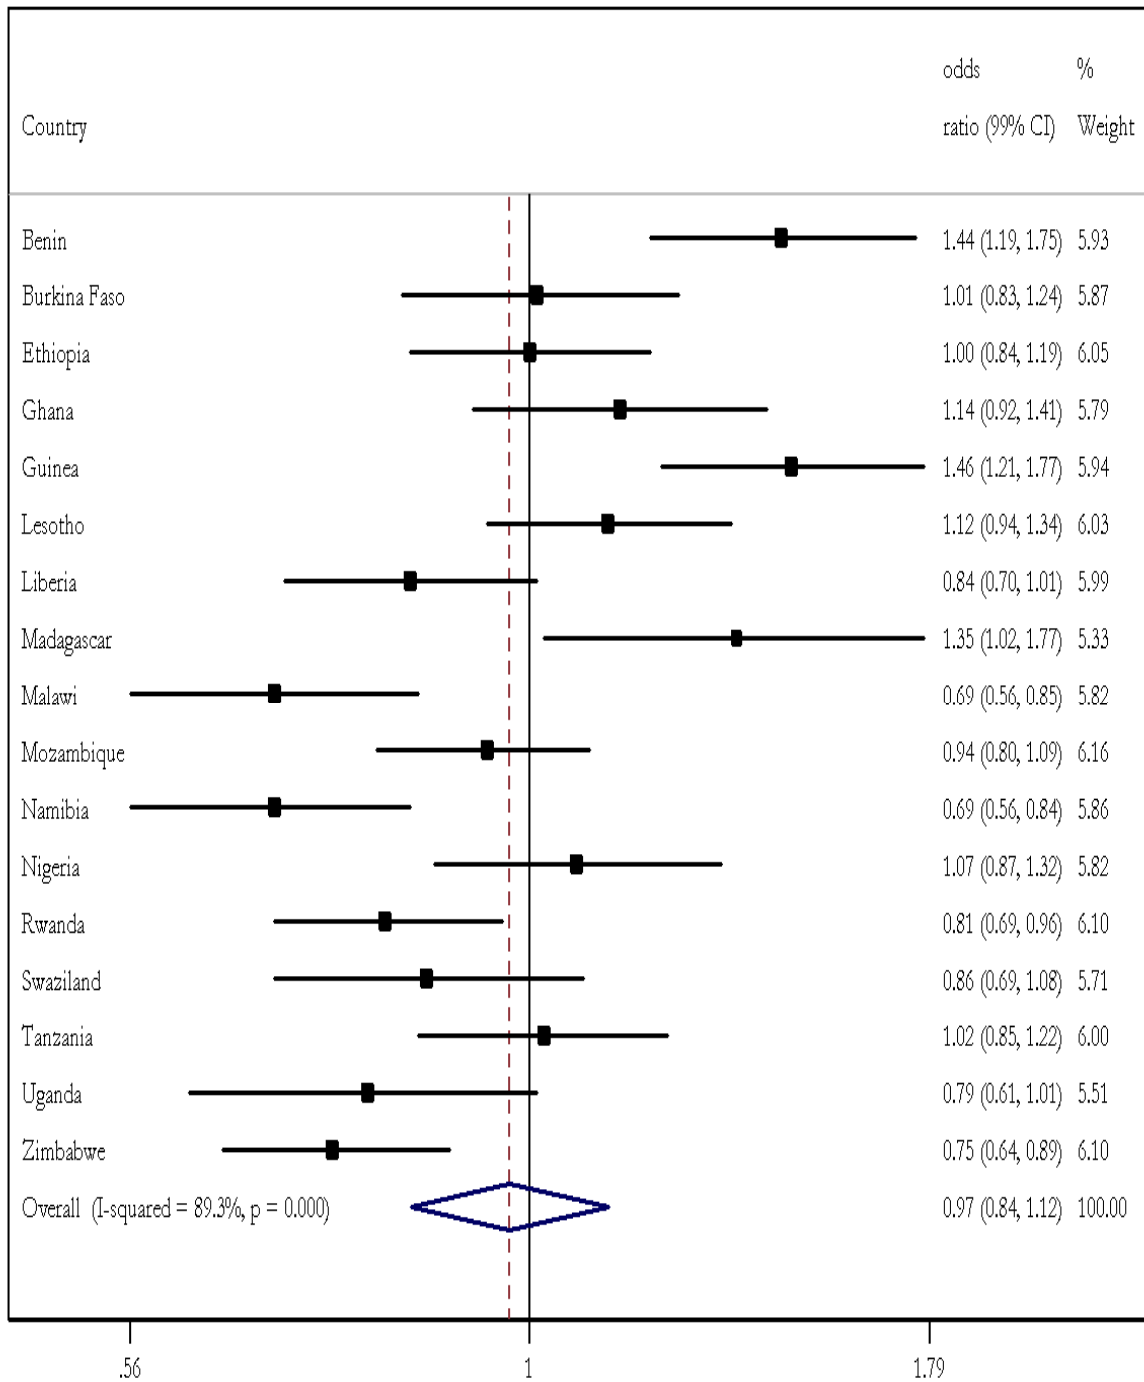

**Forest plot of the odds ratios (ORs) and 99% confidence intervals (CIs) of individual countries and pooled data for formerly married**

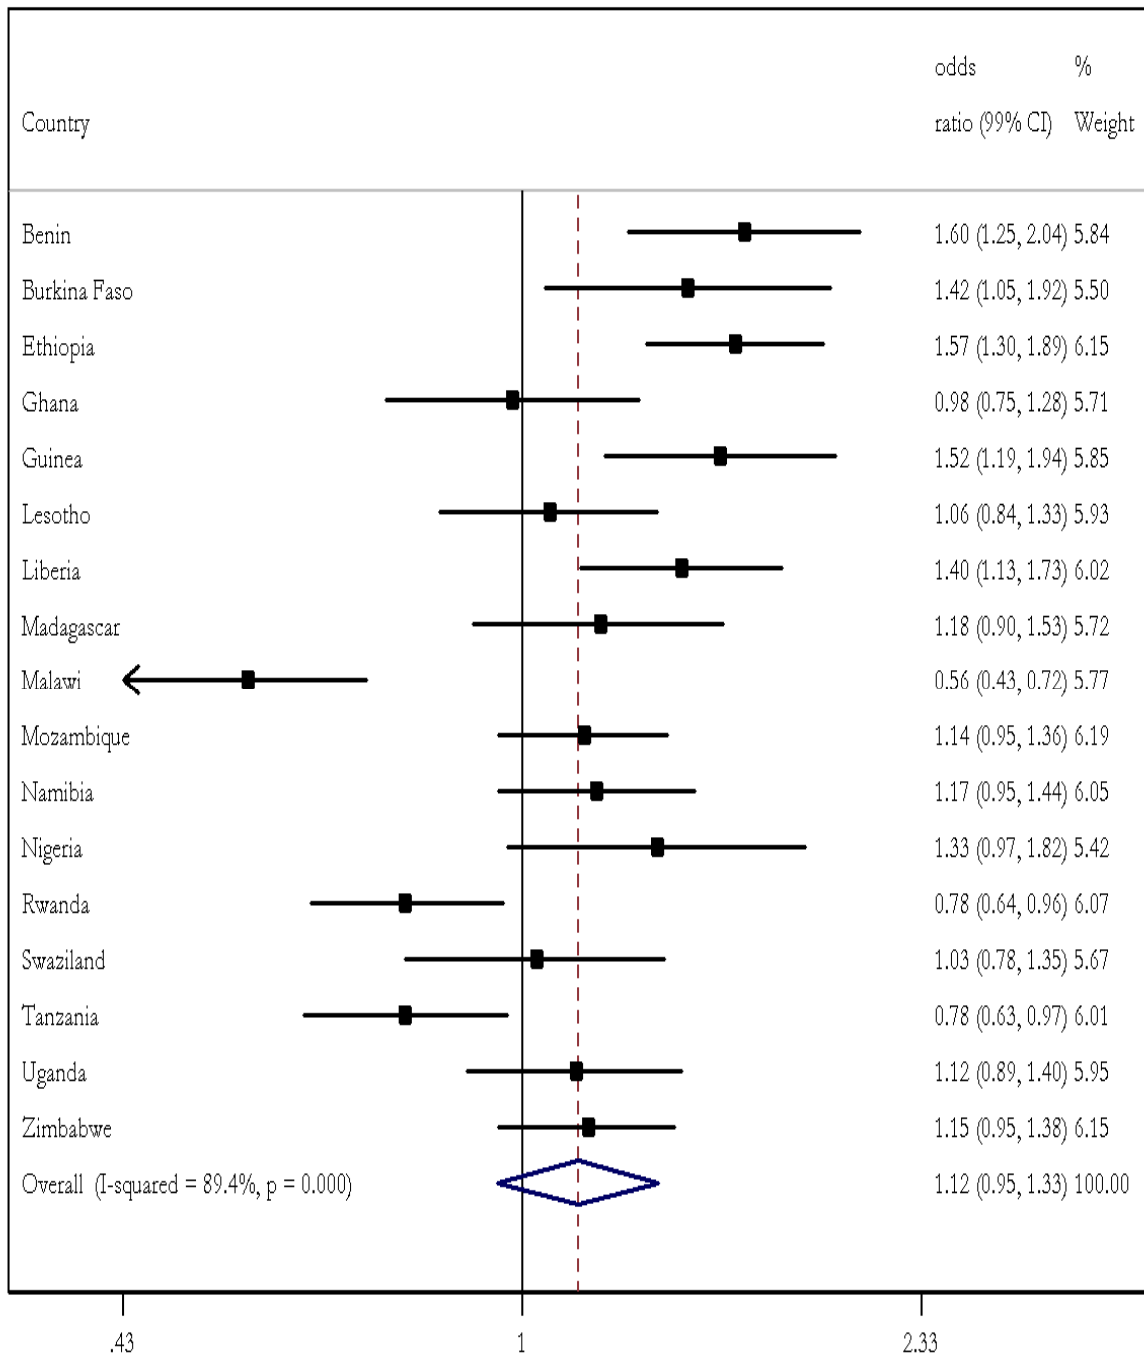



**Forest plot of the odds ratios (ORs) and 99% confidence intervals (CIs) of individual countries and pooled data for wealth status (poorest)**

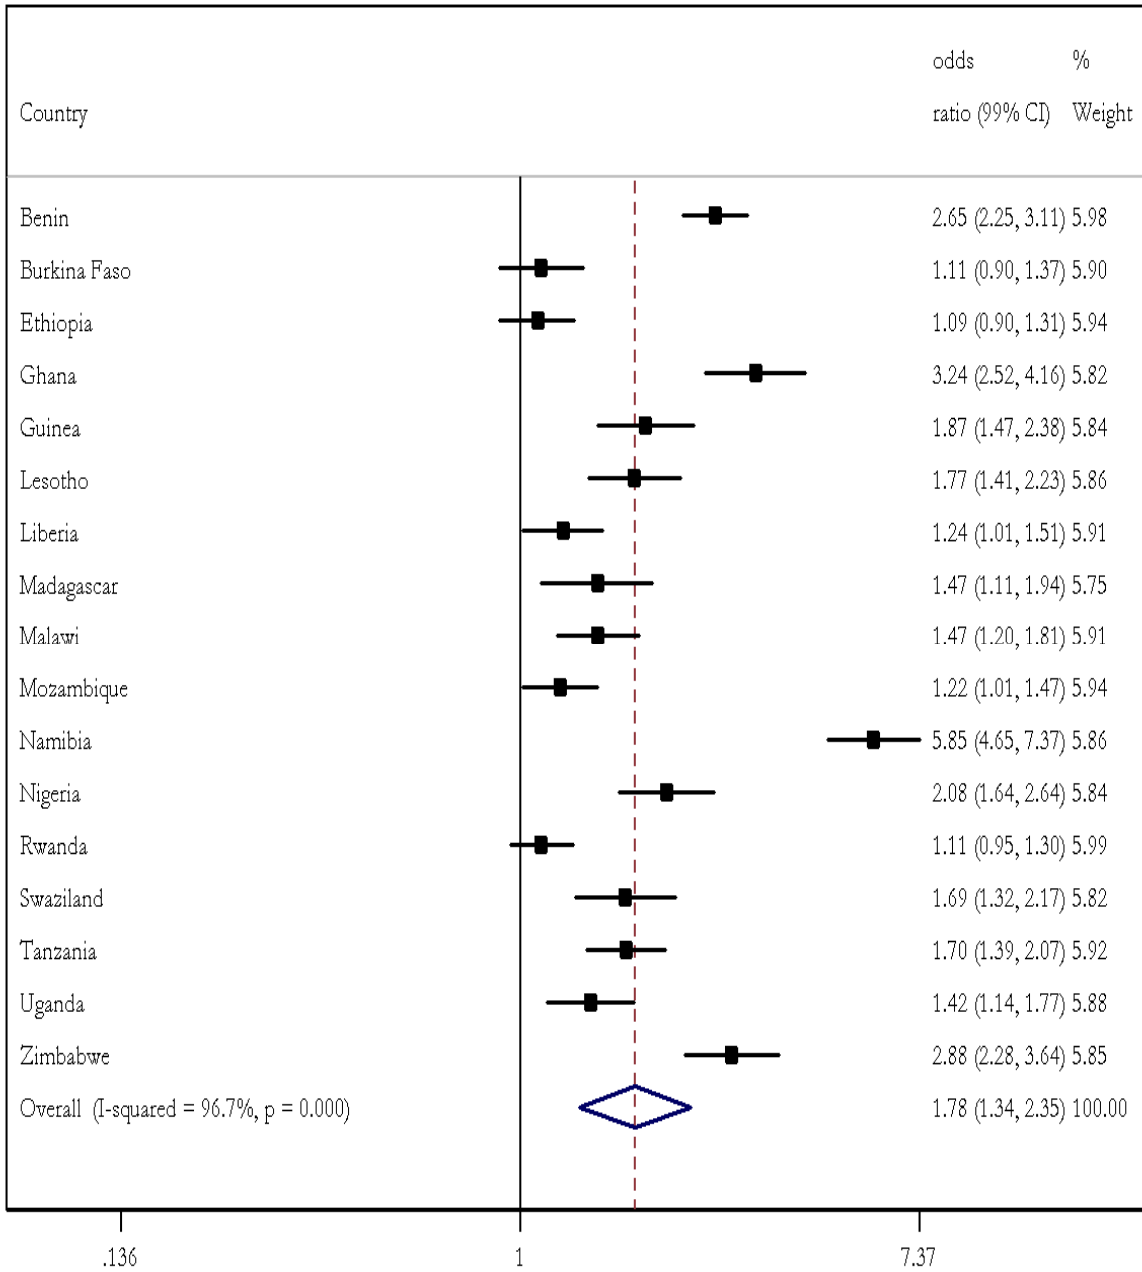

**Forest plot of the odds ratios (ORs) and 99% confidence intervals (CIs) of individual countries and pooled data for wealth status (poor)**

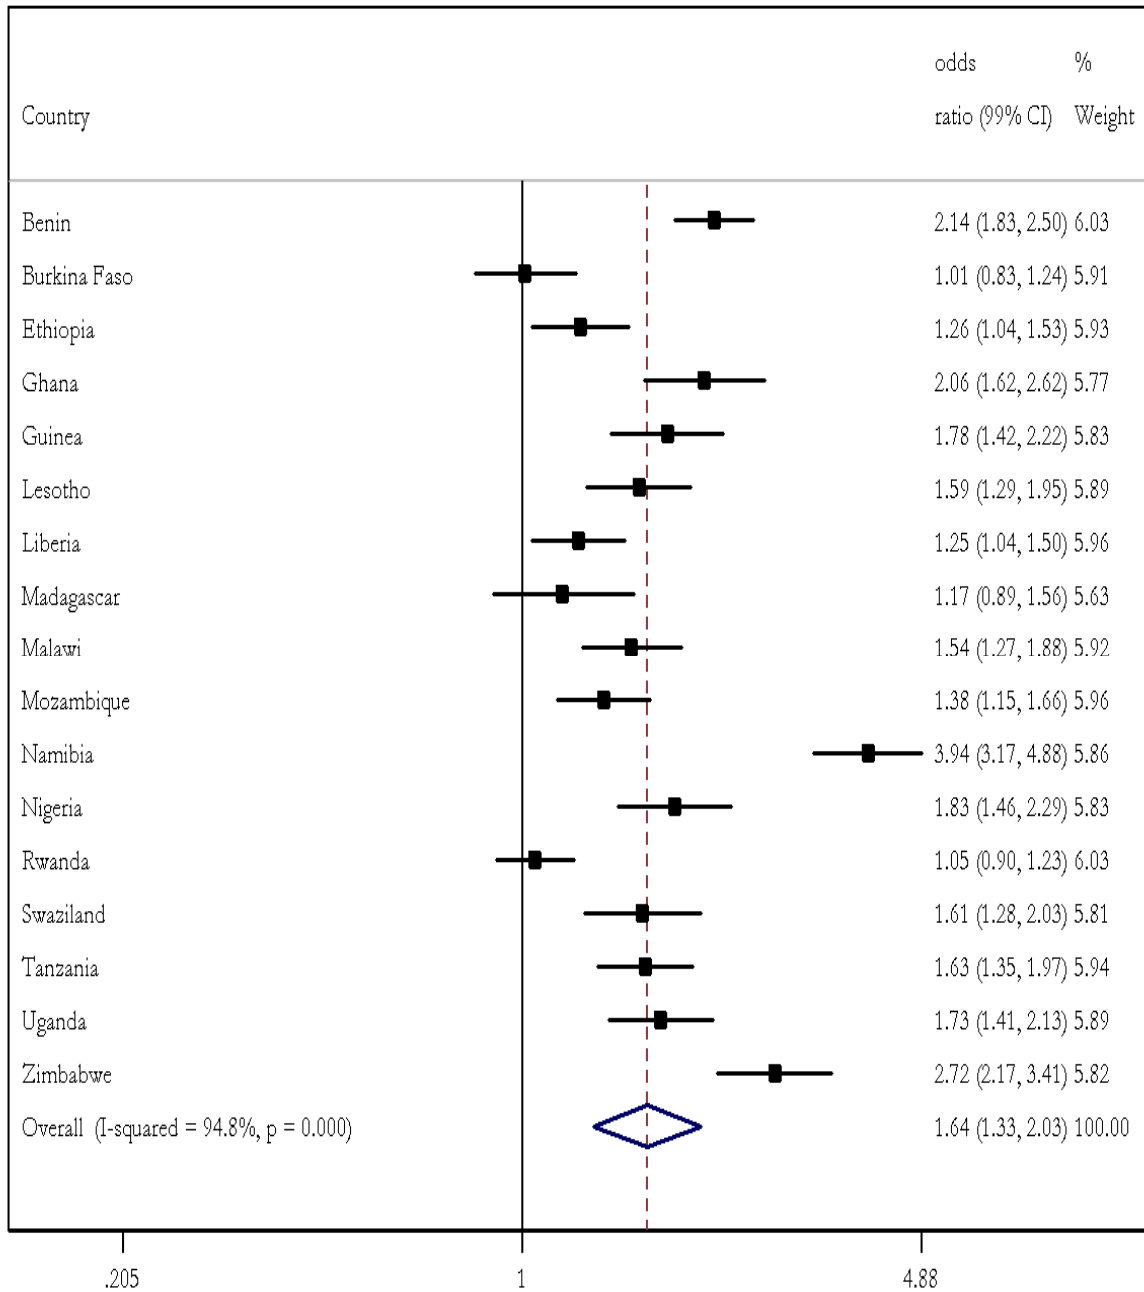

**Forest plot of the odds ratios (ORs) and 99% confidence intervals (CIs) of individual countries and pooled data for wealth index (middle)**

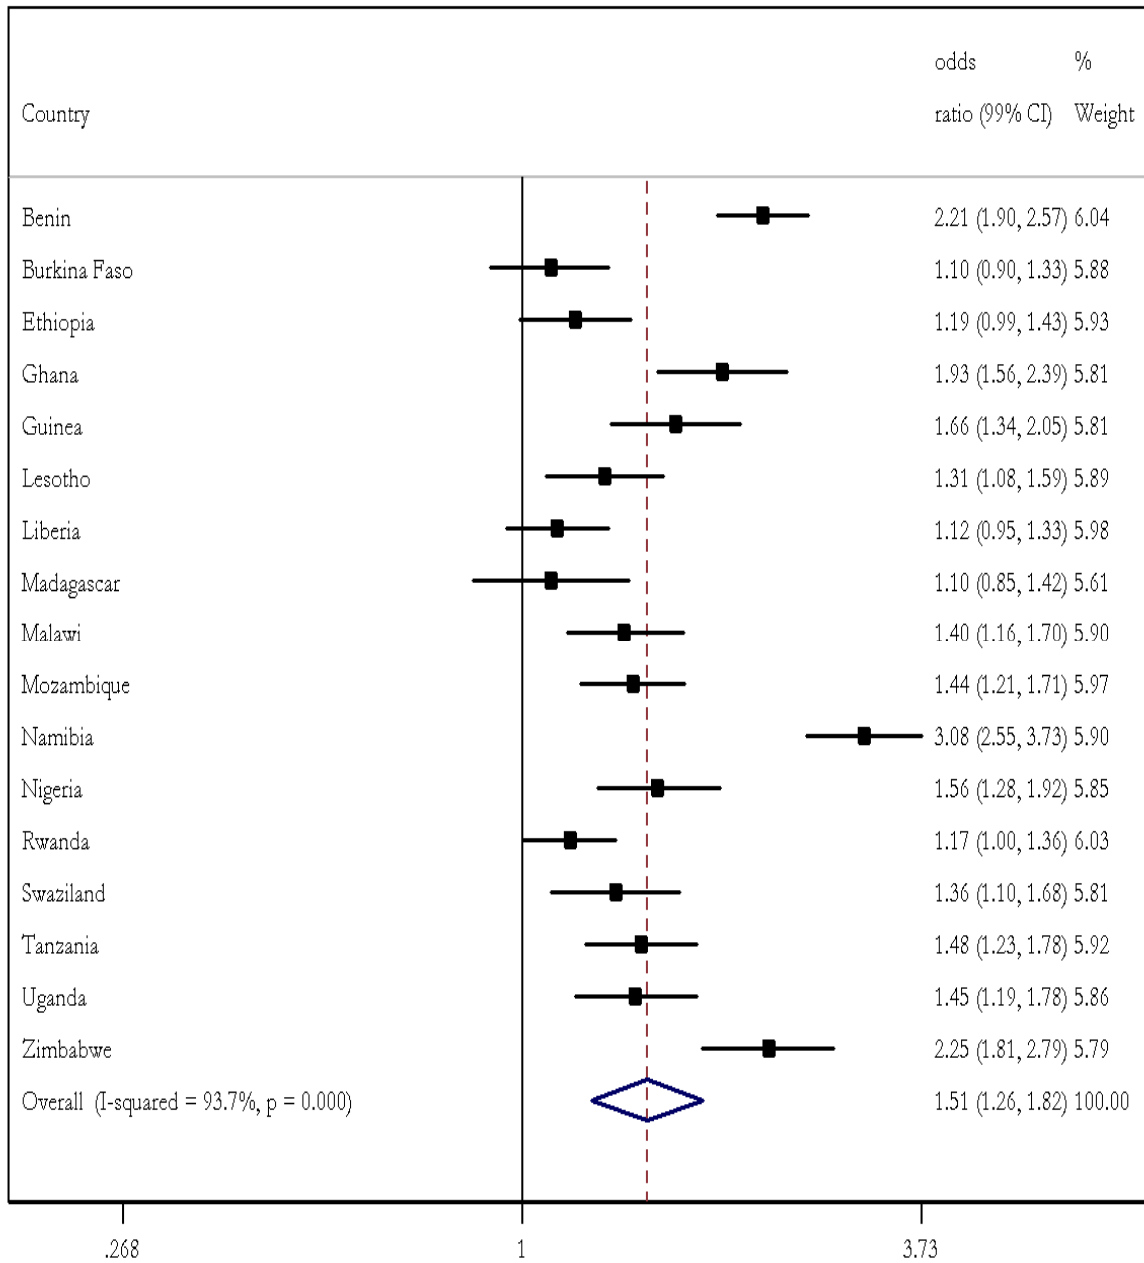

**Forest plot of the odds ratios (ORs) and 99% confidence intervals (CIs) of individual countries and pooled data for wealth status (richer)**

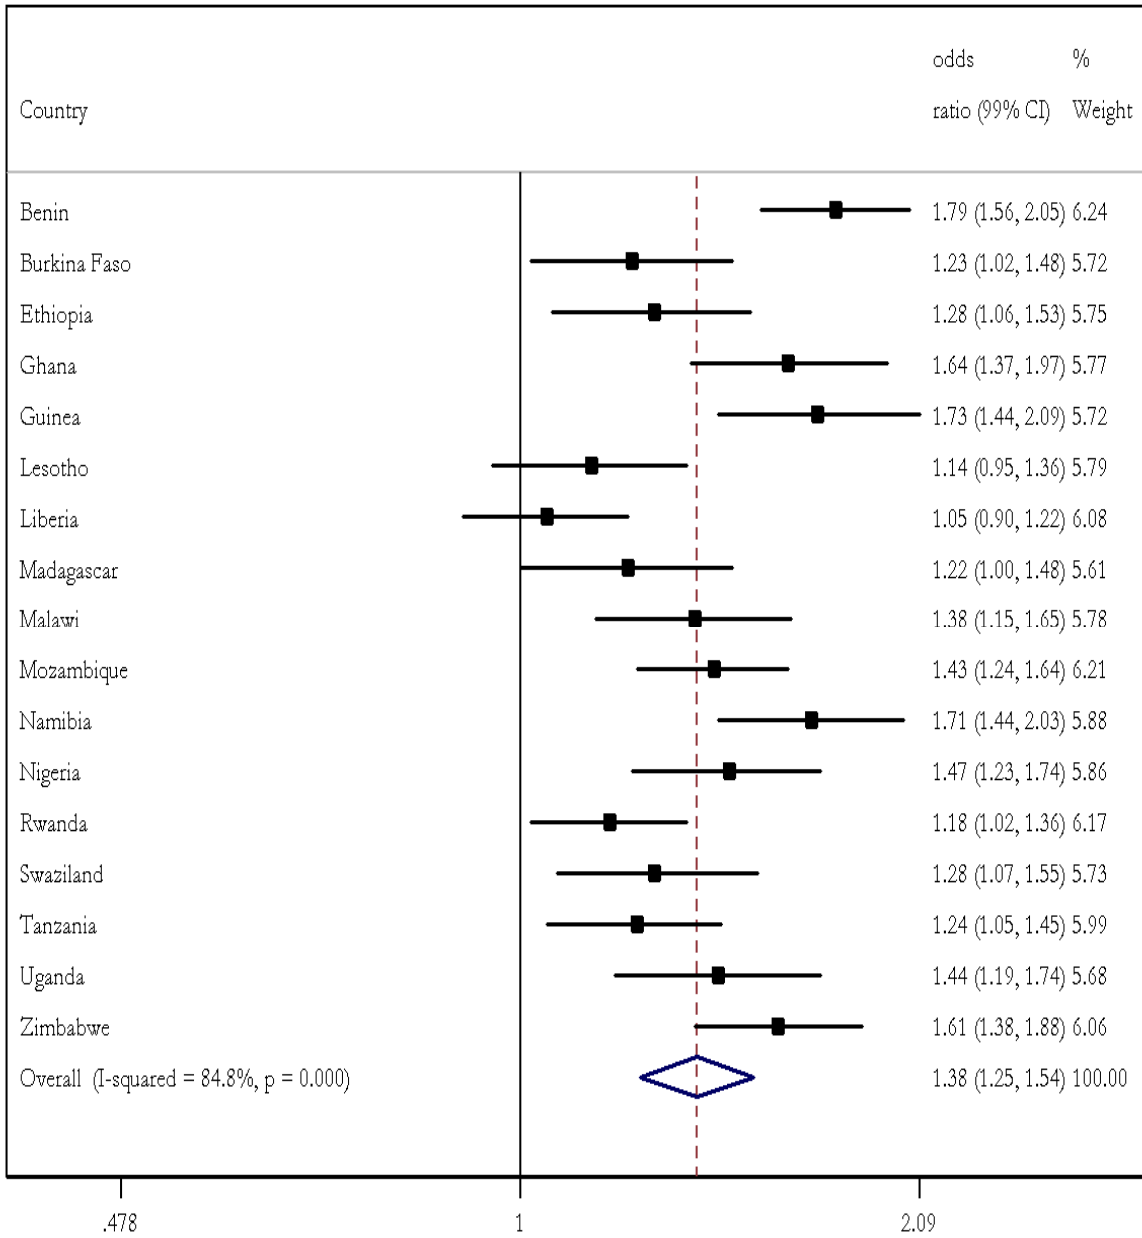

**Forest plot of the odds ratios (ORs) and 99% confidence intervals (CIs) of individual countries and pooled data for place of residence**

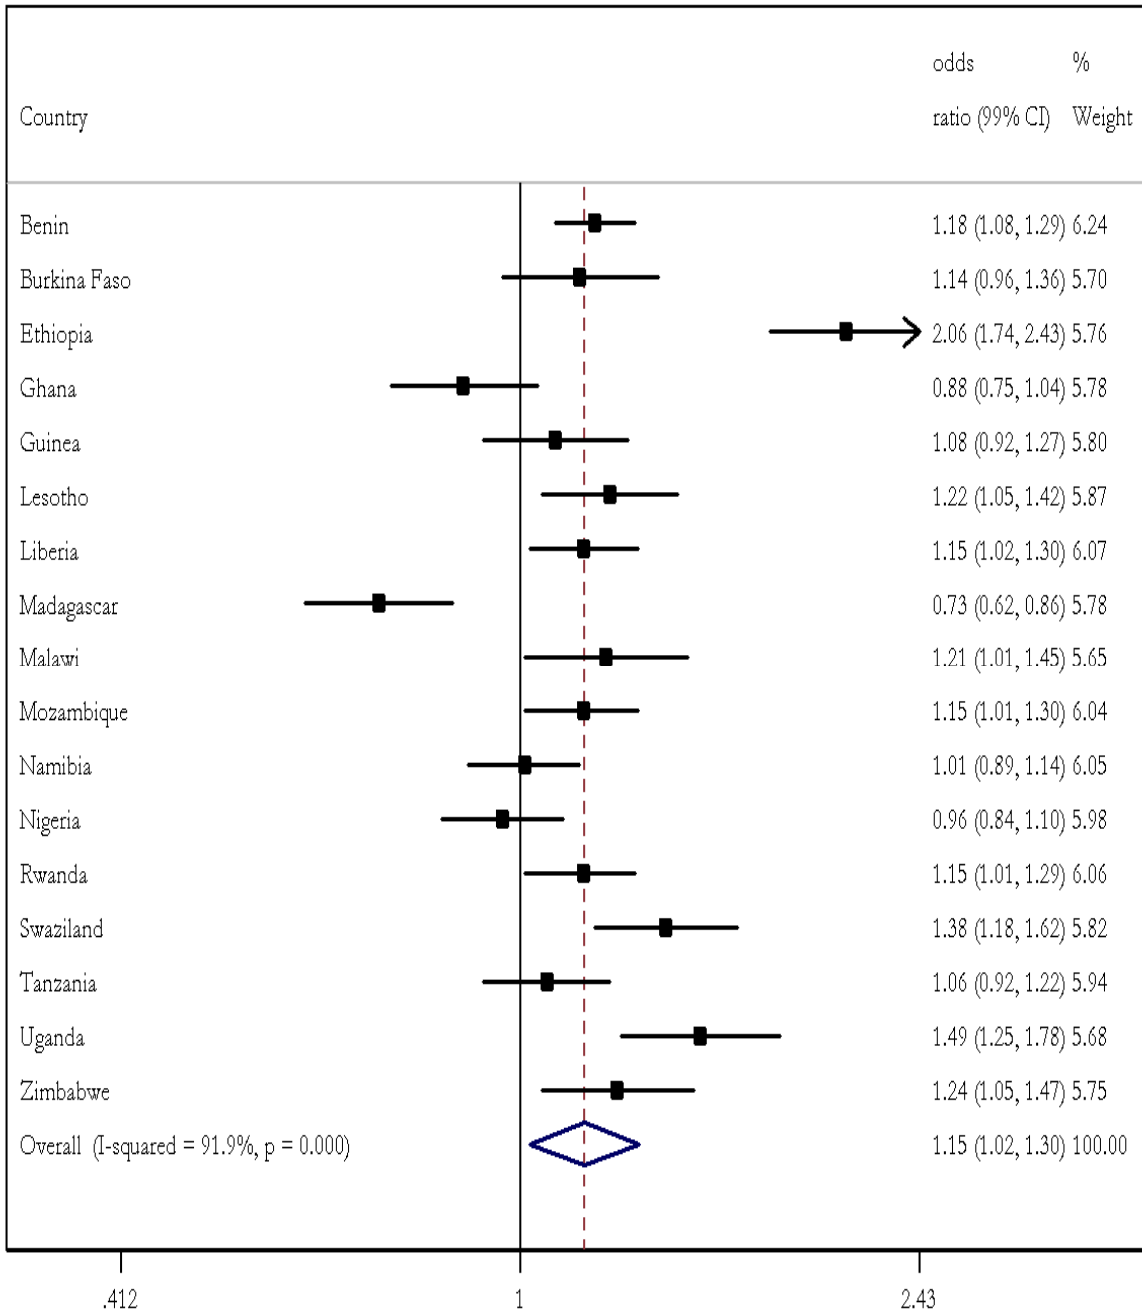

**Forest plot of the odds ratios (ORs) and 99% confidence intervals (CIs) of individual countries and pooled data for decision making autonomy (respondent alone)**

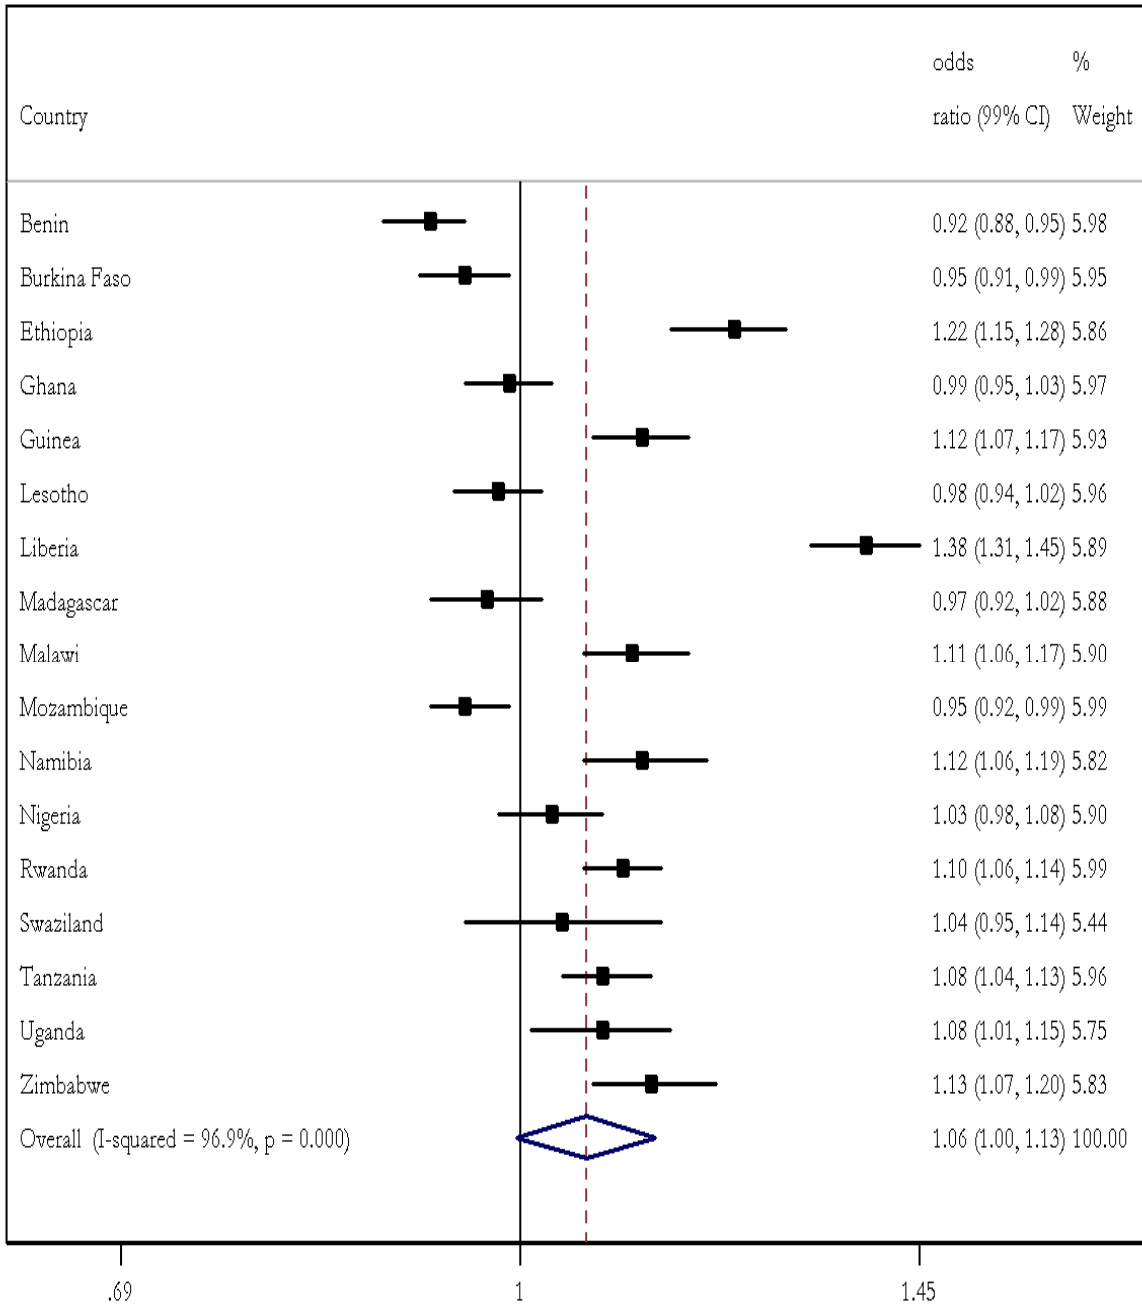

**Forest plot of the odds ratios (ORs) and 99% confidence intervals (CIs) of individual countries and pooled data decision making autonomy (Husband/partner alone)**

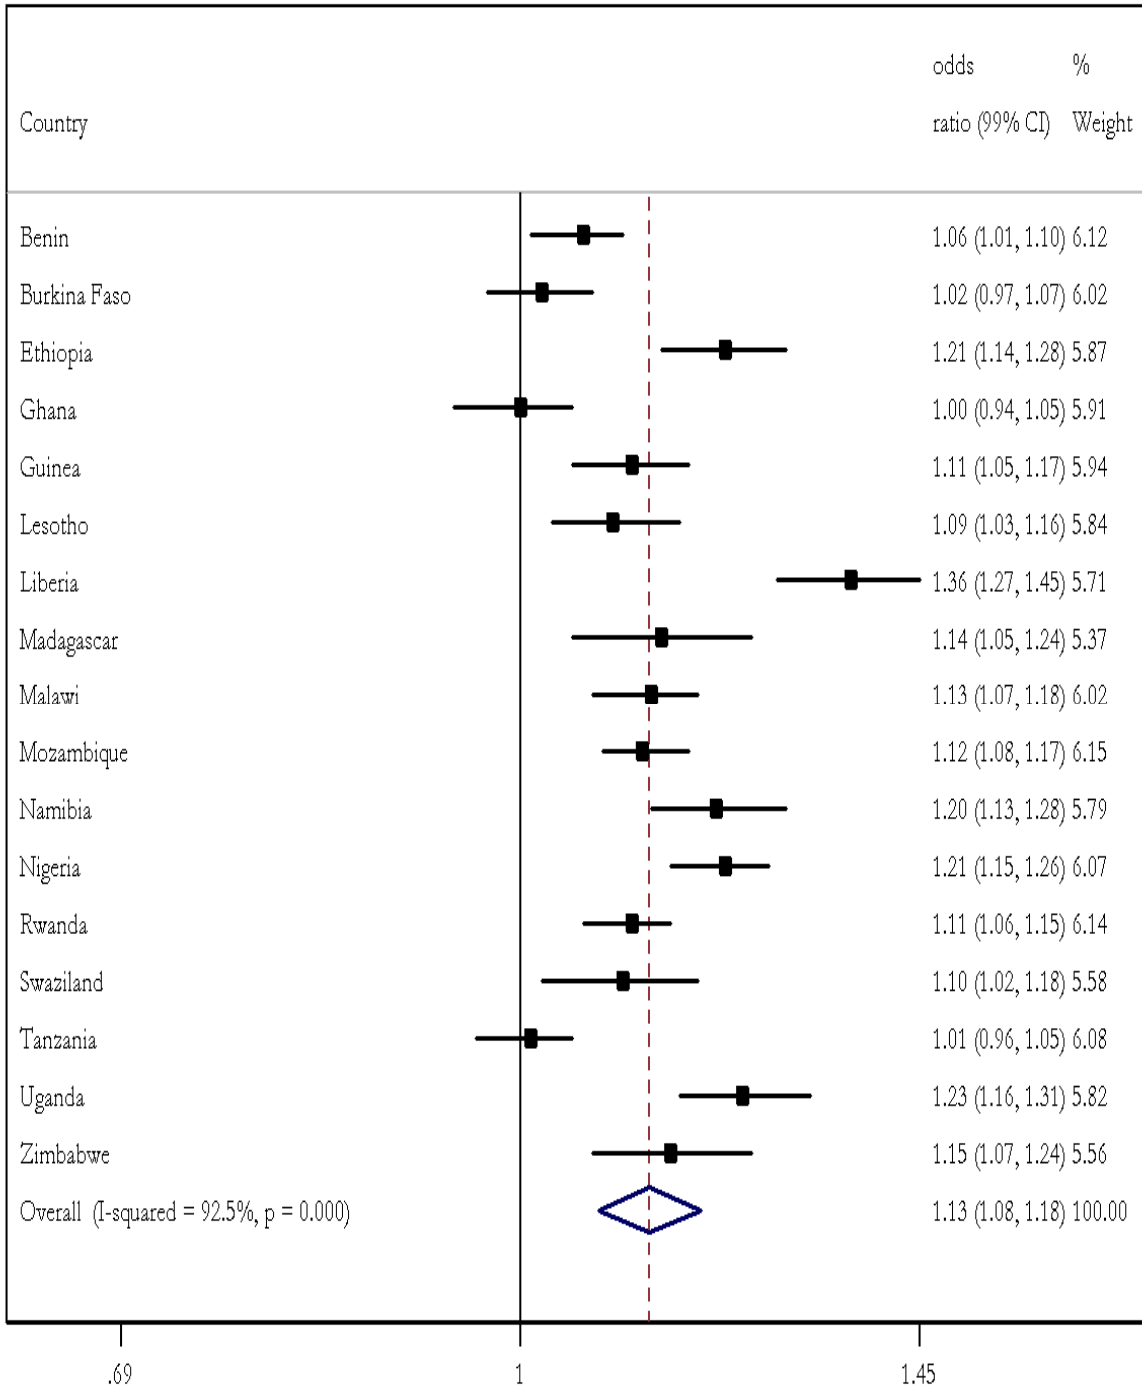

**Forest plot of the odds ratios (ORs) and 99% confidence intervals (CIs) of individual countries and pooled data for decision making autonomy (Husband and wife)**

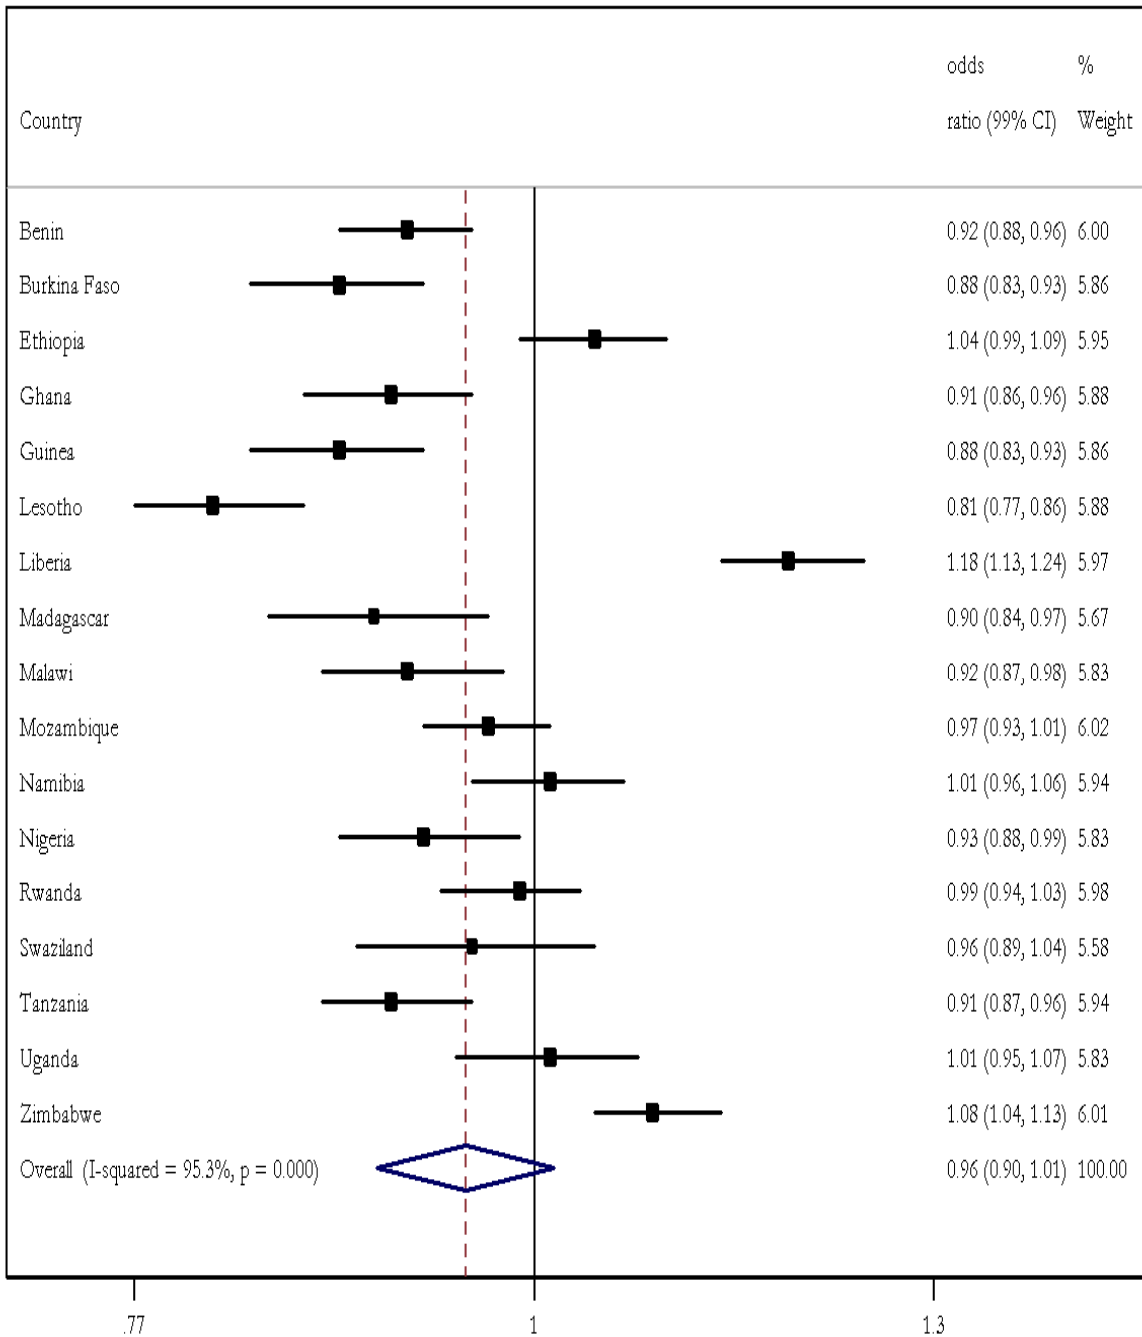



**Forest plot of the odds ratios (ORs) and 99% confidence intervals (CIs) of individual countries and pooled data for access to newspaper**

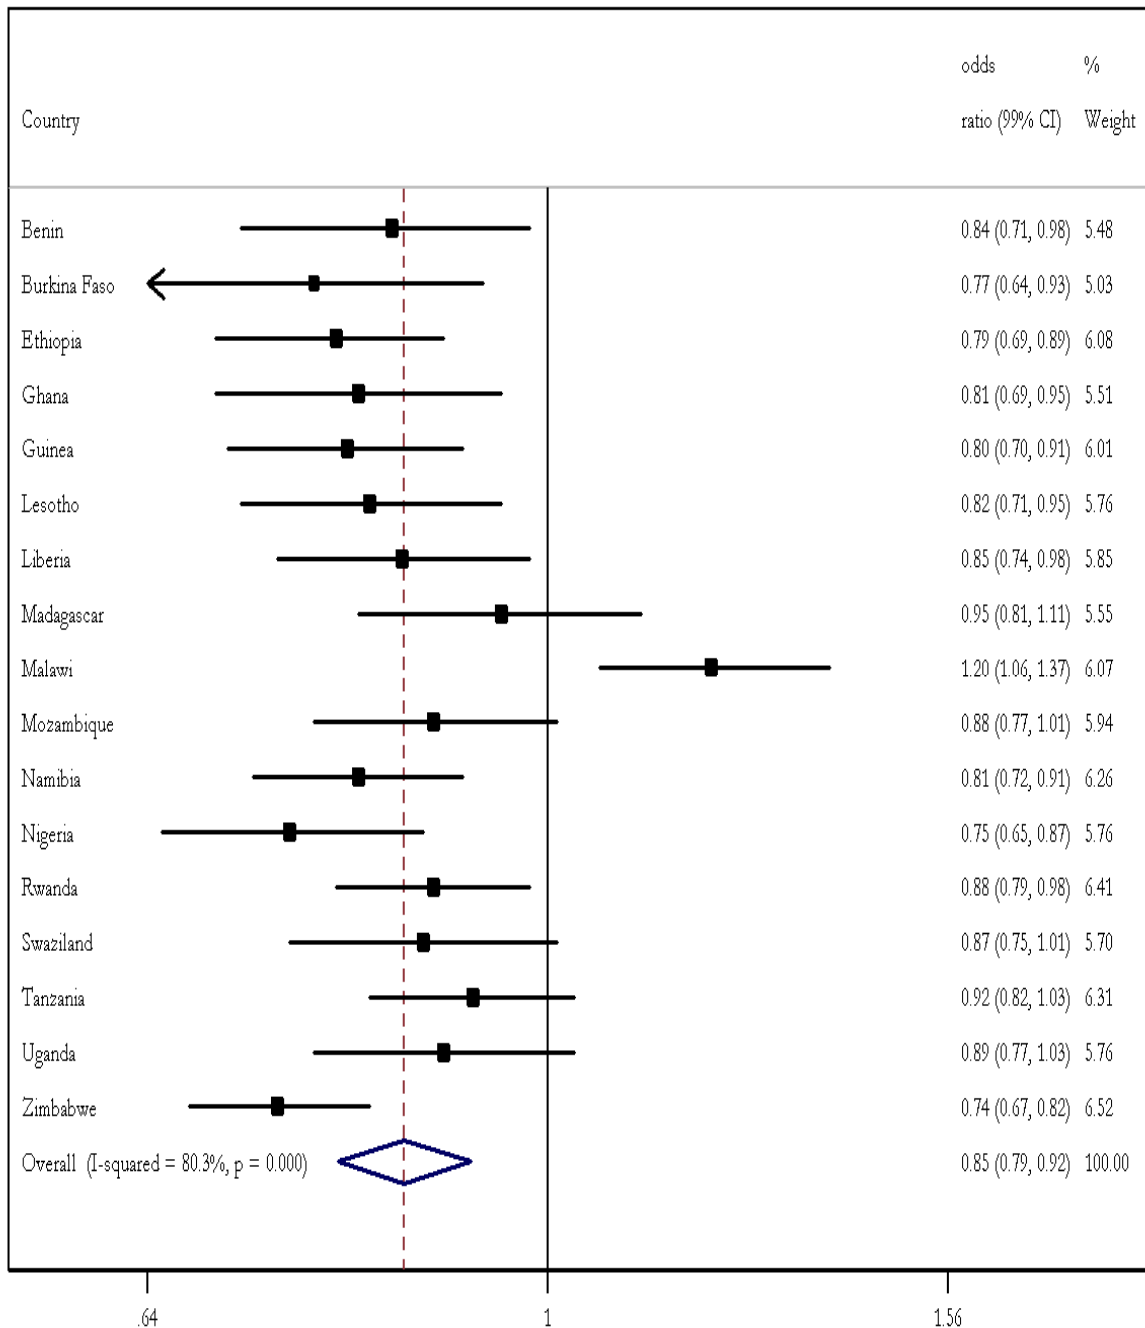

**Forest plot of the odds ratios (ORs) and 99% confidence intervals (CIs) of individual countries and pooled data for access to radio**

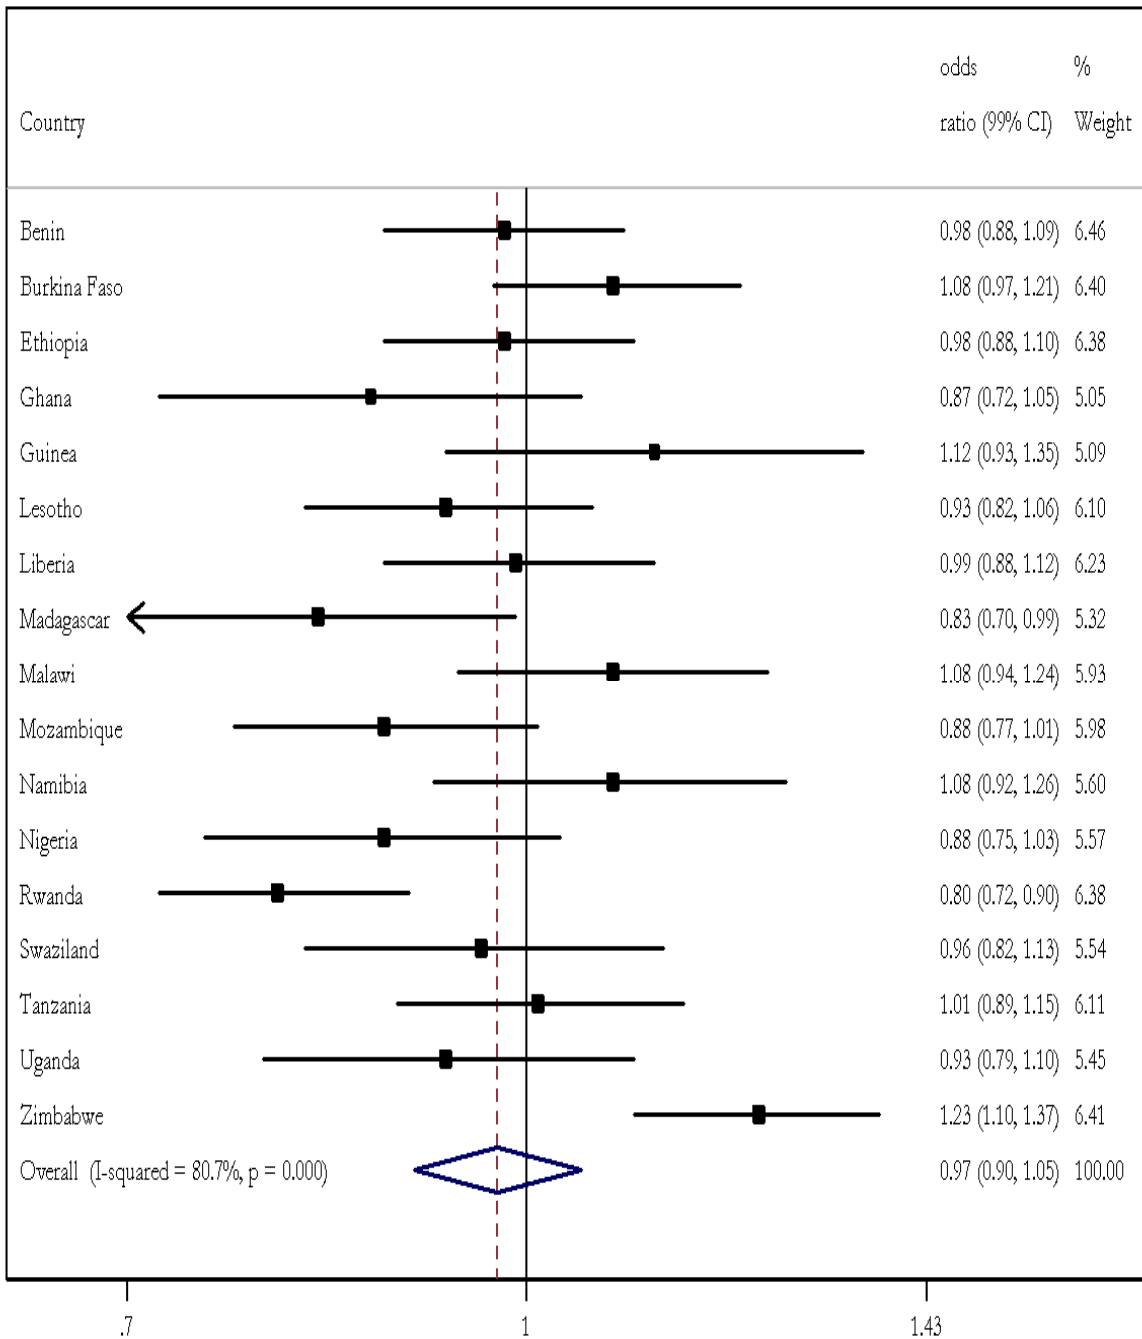

**Forest plot of the odds ratios (ORs) and 99% confidence intervals (CIs) of individual countries and pooled data for access to television**

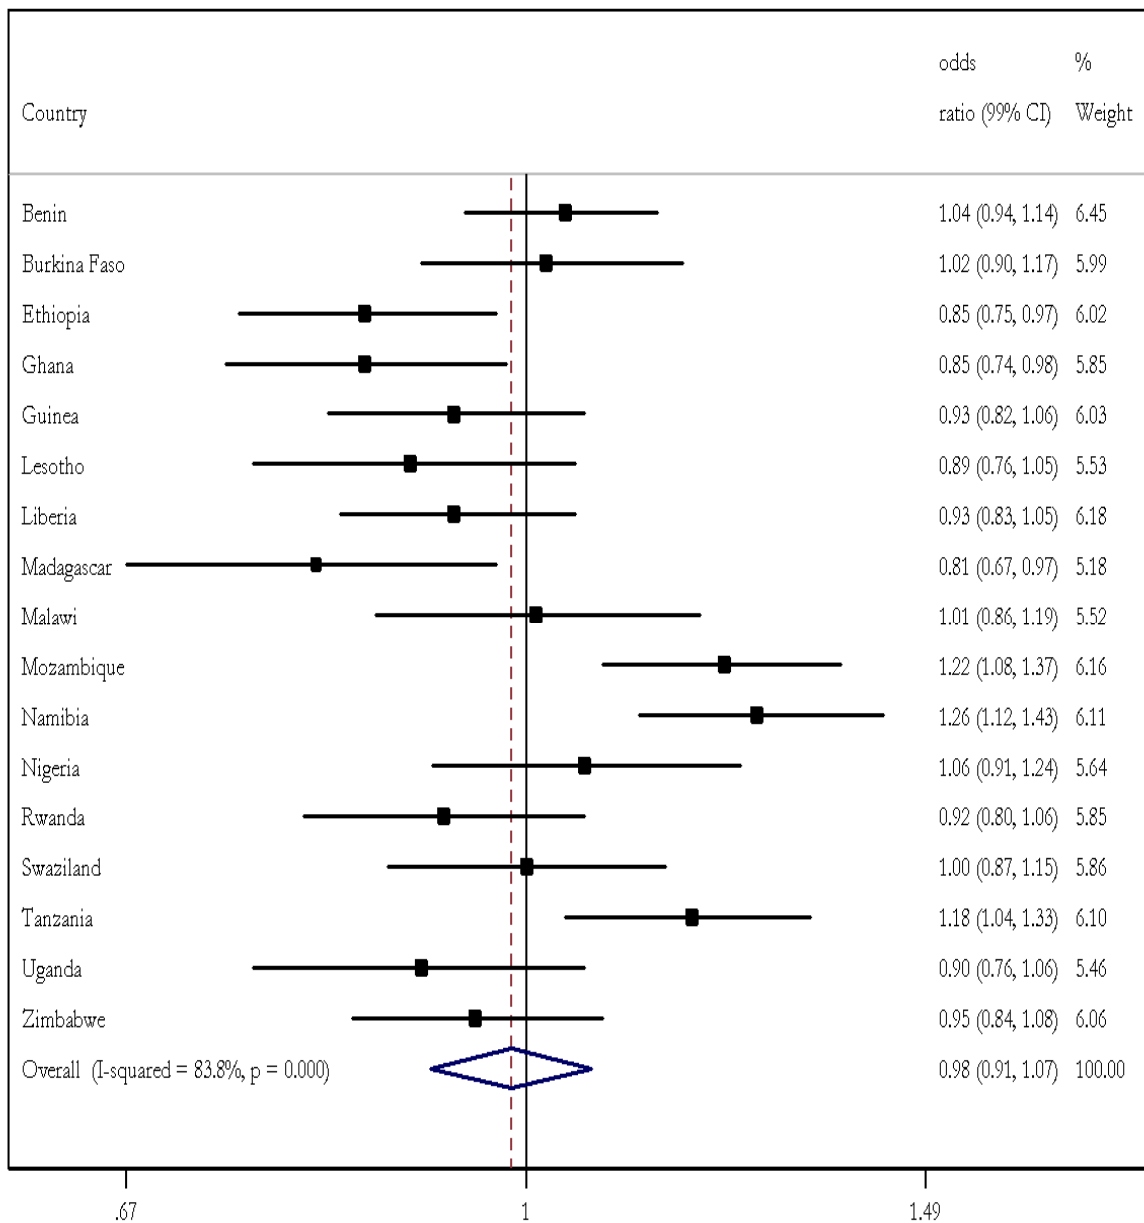

Supplement: MOESM2 [file 9537448]
